# Supplementary material
Source: PubMed Central journal article supplement (PMC8965735)
Supplement: NIHMS1653872-supplement-1.pdf [file NIHMS1653872-supplement-1.pdf]

## Applied Cognition-General Concerns-Short Form 8a

Please respond to each item by marking one box per row.

| In the past 7 days... |                                                                                                                    | Never                         | Rarely<br>(Once)              | Sometimes<br>(Two or<br>three times) | Often<br>(About once<br>a day) | Very often<br>(Several<br>times a day) |
|-----------------------|--------------------------------------------------------------------------------------------------------------------|-------------------------------|-------------------------------|--------------------------------------|--------------------------------|----------------------------------------|
|                       |                                                                                                                    | <input type="checkbox"/>      | <input type="checkbox"/>      | <input type="checkbox"/>             | <input type="checkbox"/>       | <input type="checkbox"/>               |
| PC2                   | My thinking has been slow .....                                                                                    | <input type="checkbox"/><br>1 | <input type="checkbox"/><br>2 | <input type="checkbox"/><br>3        | <input type="checkbox"/><br>4  | <input type="checkbox"/><br>5          |
| PC35                  | It has seemed like my brain was not working as well as usual .....                                                 | <input type="checkbox"/><br>1 | <input type="checkbox"/><br>2 | <input type="checkbox"/><br>3        | <input type="checkbox"/><br>4  | <input type="checkbox"/><br>5          |
| PC36                  | I have had to work harder than usual to keep track of what I was doing .....                                       | <input type="checkbox"/><br>1 | <input type="checkbox"/><br>2 | <input type="checkbox"/><br>3        | <input type="checkbox"/><br>4  | <input type="checkbox"/><br>5          |
| PC42                  | I have had trouble shifting back and forth between different activities that require thinking .....                | <input type="checkbox"/><br>1 | <input type="checkbox"/><br>2 | <input type="checkbox"/><br>3        | <input type="checkbox"/><br>4  | <input type="checkbox"/><br>5          |
| PC8                   | I have had trouble concentrating .....                                                                             | <input type="checkbox"/><br>1 | <input type="checkbox"/><br>2 | <input type="checkbox"/><br>3        | <input type="checkbox"/><br>4  | <input type="checkbox"/><br>5          |
| PC25                  | I have had to work really hard to pay attention or I would make a mistake .....                                    | <input type="checkbox"/><br>1 | <input type="checkbox"/><br>2 | <input type="checkbox"/><br>3        | <input type="checkbox"/><br>4  | <input type="checkbox"/><br>5          |
| PC1                   | I have had trouble forming thoughts .....                                                                          | <input type="checkbox"/><br>1 | <input type="checkbox"/><br>2 | <input type="checkbox"/><br>3        | <input type="checkbox"/><br>4  | <input type="checkbox"/><br>5          |
| PC53                  | My problems with memory, concentration, or making mental mistakes have interfered with the quality of my life..... | <input type="checkbox"/><br>1 | <input type="checkbox"/><br>2 | <input type="checkbox"/><br>3        | <input type="checkbox"/><br>4  | <input type="checkbox"/><br>5          |
