# Supplementary material
Source: PubMed Central journal article supplement (PMC8965735)
Supplement: NIHMS1653872-supplement-2.pdf [file NIHMS1653872-supplement-2.pdf]

## Physical Function – Short Form 10a

**Please respond to each item by marking one box per row.**

|       |                                                                                                                                              | <b>Not at all</b>             | <b>Very little</b>              | <b>Somewhat</b>               | <b>Quite a lot</b>            | <b>Cannot do</b>              |
|-------|----------------------------------------------------------------------------------------------------------------------------------------------|-------------------------------|---------------------------------|-------------------------------|-------------------------------|-------------------------------|
| PFA01 | Does your health now limit you in doing vigorous activities, such as running, lifting heavy objects, participating in strenuous sports?..... | <input type="checkbox"/><br>5 | <input type="checkbox"/><br>4   | <input type="checkbox"/><br>3 | <input type="checkbox"/><br>2 | <input type="checkbox"/><br>1 |
| PFC36 | Does your health now limit you in walking more than a mile?.....                                                                             | <input type="checkbox"/><br>5 | <input type="checkbox"/><br>4   | <input type="checkbox"/><br>3 | <input type="checkbox"/><br>2 | <input type="checkbox"/><br>1 |
| PFC37 | Does your health now limit you in climbing one flight of stairs?.....                                                                        | <input type="checkbox"/><br>5 | <input type="checkbox"/><br>4   | <input type="checkbox"/><br>3 | <input type="checkbox"/><br>2 | <input type="checkbox"/><br>1 |
| PFA05 | Does your health now limit you in lifting or carrying groceries?.....                                                                        | <input type="checkbox"/><br>5 | <input type="checkbox"/><br>4   | <input type="checkbox"/><br>3 | <input type="checkbox"/><br>2 | <input type="checkbox"/><br>1 |
| PFA03 | Does your health now limit you in bending, kneeling, or stooping?.....                                                                       | <input type="checkbox"/><br>5 | <input type="checkbox"/><br>4   | <input type="checkbox"/><br>3 | <input type="checkbox"/><br>2 | <input type="checkbox"/><br>1 |
|       |                                                                                                                                              | <b>Without any difficulty</b> | <b>With a little difficulty</b> | <b>With some difficulty</b>   | <b>With much difficulty</b>   | <b>Unable to do</b>           |
| PFA11 | Are you able to do chores such as vacuuming or yard work?.....                                                                               | <input type="checkbox"/><br>5 | <input type="checkbox"/><br>4   | <input type="checkbox"/><br>3 | <input type="checkbox"/><br>2 | <input type="checkbox"/><br>1 |
| PFA16 | Are you able to dress yourself, including tying shoelaces and doing buttons?.....                                                            | <input type="checkbox"/><br>5 | <input type="checkbox"/><br>4   | <input type="checkbox"/><br>3 | <input type="checkbox"/><br>2 | <input type="checkbox"/><br>1 |
| PFB26 | Are you able to shampoo your hair?.....                                                                                                      | <input type="checkbox"/><br>5 | <input type="checkbox"/><br>4   | <input type="checkbox"/><br>3 | <input type="checkbox"/><br>2 | <input type="checkbox"/><br>1 |
| PFA55 | Are you able to wash and dry your body?.....                                                                                                 | <input type="checkbox"/><br>5 | <input type="checkbox"/><br>4   | <input type="checkbox"/><br>3 | <input type="checkbox"/><br>2 | <input type="checkbox"/><br>1 |
| PFC45 | Are you able to get on and off the toilet?.....                                                                                              | <input type="checkbox"/><br>5 | <input type="checkbox"/><br>4   | <input type="checkbox"/><br>3 | <input type="checkbox"/><br>2 | <input type="checkbox"/><br>1 |
