# Supplementary material
Source: PubMed Central journal article supplement (PMC8965735)
Supplement: NIHMS1653872-supplement-3.pdf [file NIHMS1653872-supplement-3.pdf]

## Global Health

Please respond to each item by marking one box per row.

|          |                                                                                                                                                                                                                                         | Excellent                     | Very good                     | Good                          | Fair                          | Poor                          |
|----------|-----------------------------------------------------------------------------------------------------------------------------------------------------------------------------------------------------------------------------------------|-------------------------------|-------------------------------|-------------------------------|-------------------------------|-------------------------------|
| Global01 | In general, would you say your health is: .....                                                                                                                                                                                         | <input type="checkbox"/><br>5 | <input type="checkbox"/><br>4 | <input type="checkbox"/><br>3 | <input type="checkbox"/><br>2 | <input type="checkbox"/><br>1 |
| Global02 | In general, would you say your quality of life is: .....                                                                                                                                                                                | <input type="checkbox"/><br>5 | <input type="checkbox"/><br>4 | <input type="checkbox"/><br>3 | <input type="checkbox"/><br>2 | <input type="checkbox"/><br>1 |
| Global03 | In general, how would you rate your physical health? .....                                                                                                                                                                              | <input type="checkbox"/><br>5 | <input type="checkbox"/><br>4 | <input type="checkbox"/><br>3 | <input type="checkbox"/><br>2 | <input type="checkbox"/><br>1 |
| Global04 | In general, how would you rate your mental health, including your mood and your ability to think? .....                                                                                                                                 | <input type="checkbox"/><br>5 | <input type="checkbox"/><br>4 | <input type="checkbox"/><br>3 | <input type="checkbox"/><br>2 | <input type="checkbox"/><br>1 |
| Global05 | In general, how would you rate your satisfaction with your social activities and relationships? .....                                                                                                                                   | <input type="checkbox"/><br>5 | <input type="checkbox"/><br>4 | <input type="checkbox"/><br>3 | <input type="checkbox"/><br>2 | <input type="checkbox"/><br>1 |
| Global09 | In general, please rate how well you carry out your usual social activities and roles. (This includes activities at home, at work and in your community, and responsibilities as a parent, child, spouse, employee, friend, etc.) ..... | <input type="checkbox"/><br>5 | <input type="checkbox"/><br>4 | <input type="checkbox"/><br>3 | <input type="checkbox"/><br>2 | <input type="checkbox"/><br>1 |
| Global06 | To what extent are you able to carry out your everyday physical activities such as walking, climbing stairs, carrying groceries, or moving a chair? .....                                                                               | <input type="checkbox"/><br>5 | <input type="checkbox"/><br>4 | <input type="checkbox"/><br>3 | <input type="checkbox"/><br>2 | <input type="checkbox"/><br>1 |

**In the past 7 days...**

|          |                                                                                                               | Never                                                                                                                                      | Rarely                        | Sometimes                     | Often                         | Always                        |                               |                               |                               |                               |                               |                                                         |
|----------|---------------------------------------------------------------------------------------------------------------|--------------------------------------------------------------------------------------------------------------------------------------------|-------------------------------|-------------------------------|-------------------------------|-------------------------------|-------------------------------|-------------------------------|-------------------------------|-------------------------------|-------------------------------|---------------------------------------------------------|
| Global10 | How often have you been bothered by emotional problems such as feeling anxious, depressed or irritable? ..... | <input type="checkbox"/><br>1                                                                                                              | <input type="checkbox"/><br>2 | <input type="checkbox"/><br>3 | <input type="checkbox"/><br>4 | <input type="checkbox"/><br>5 |                               |                               |                               |                               |                               |                                                         |
|          |                                                                                                               | <table border="1"> <thead> <tr> <th>None</th> <th>Mild</th> <th>Moderate</th> <th>Severe</th> <th>Very severe</th> </tr> </thead> </table> |                               |                               |                               |                               | None                          | Mild                          | Moderate                      | Severe                        | Very severe                   |                                                         |
| None     | Mild                                                                                                          | Moderate                                                                                                                                   | Severe                        | Very severe                   |                               |                               |                               |                               |                               |                               |                               |                                                         |
| Global08 | How would you rate your fatigue on average? ....                                                              | <input type="checkbox"/><br>1                                                                                                              | <input type="checkbox"/><br>2 | <input type="checkbox"/><br>3 | <input type="checkbox"/><br>4 | <input type="checkbox"/><br>5 |                               |                               |                               |                               |                               |                                                         |
| Global07 | How would you rate your pain on average?.....                                                                 | <input type="checkbox"/><br>0<br>No pain                                                                                                   | <input type="checkbox"/><br>1 | <input type="checkbox"/><br>2 | <input type="checkbox"/><br>3 | <input type="checkbox"/><br>4 | <input type="checkbox"/><br>5 | <input type="checkbox"/><br>6 | <input type="checkbox"/><br>7 | <input type="checkbox"/><br>8 | <input type="checkbox"/><br>9 | <input type="checkbox"/><br>10<br>Worst imaginable pain |
