# Supplementary material
Source: PubMed Central journal article supplement (PMC8965735)
Supplement: NIHMS1653872-supplement-4.pdf [file NIHMS1653872-supplement-4.pdf]

## Satisfaction with Social Roles and Activities – Short Form 8a

Please respond to each item by marking one box per row.

|                   |                                                                                                           | Not at all                    | A little bit                  | Somewhat                      | Quite a bit                   | Very much                     |
|-------------------|-----------------------------------------------------------------------------------------------------------|-------------------------------|-------------------------------|-------------------------------|-------------------------------|-------------------------------|
| SRPSAT06r1        | I am satisfied with my ability to do things for my family .....                                           | <input type="checkbox"/><br>1 | <input type="checkbox"/><br>2 | <input type="checkbox"/><br>3 | <input type="checkbox"/><br>4 | <input type="checkbox"/><br>5 |
| SRPSAT33_<br>CaPS | I am satisfied with my ability to do things for fun with others.....                                      | <input type="checkbox"/><br>1 | <input type="checkbox"/><br>2 | <input type="checkbox"/><br>3 | <input type="checkbox"/><br>4 | <input type="checkbox"/><br>5 |
| SRPSAT34r1        | I feel good about my ability to do things for my friends.....                                             | <input type="checkbox"/><br>1 | <input type="checkbox"/><br>2 | <input type="checkbox"/><br>3 | <input type="checkbox"/><br>4 | <input type="checkbox"/><br>5 |
| SRPSAT49r1        | I am satisfied with my ability to perform my daily routines .....                                         | <input type="checkbox"/><br>1 | <input type="checkbox"/><br>2 | <input type="checkbox"/><br>3 | <input type="checkbox"/><br>4 | <input type="checkbox"/><br>5 |
| SRPSAT33r1        | I am satisfied with my ability to do things for fun outside my home .....                                 | <input type="checkbox"/><br>1 | <input type="checkbox"/><br>2 | <input type="checkbox"/><br>3 | <input type="checkbox"/><br>4 | <input type="checkbox"/><br>5 |
| SRPSAT46_<br>CaPS | I am satisfied with my ability to meet the needs of my friends.....                                       | <input type="checkbox"/><br>1 | <input type="checkbox"/><br>2 | <input type="checkbox"/><br>3 | <input type="checkbox"/><br>4 | <input type="checkbox"/><br>5 |
| SRPSAT09r1        | I am satisfied with my ability to do the work that is really important to me (include work at home) ..... | <input type="checkbox"/><br>1 | <input type="checkbox"/><br>2 | <input type="checkbox"/><br>3 | <input type="checkbox"/><br>4 | <input type="checkbox"/><br>5 |
| SRPSAT45_<br>CaPS | I am satisfied with my ability to meet the needs of my family .....                                       | <input type="checkbox"/><br>1 | <input type="checkbox"/><br>2 | <input type="checkbox"/><br>3 | <input type="checkbox"/><br>4 | <input type="checkbox"/><br>5 |
